# Supplementary material for: Domain collapse and active site ablation generate a widespread animal mitochondrial seryl-tRNA synthetase
Source: PubMed Central journal article supplement (PMC10570016; doi:10.1093/nar/gkad696), 2023-08-28
Supplement: gkad696_supplemental_file.pdf [file gkad696_supplemental_file.pdf]

# Supplementary figure 1. Phylogenetic analysis of metazoan SerRS, SerRS2, SLIMP, and SerRS2 $\alpha$ sequences.

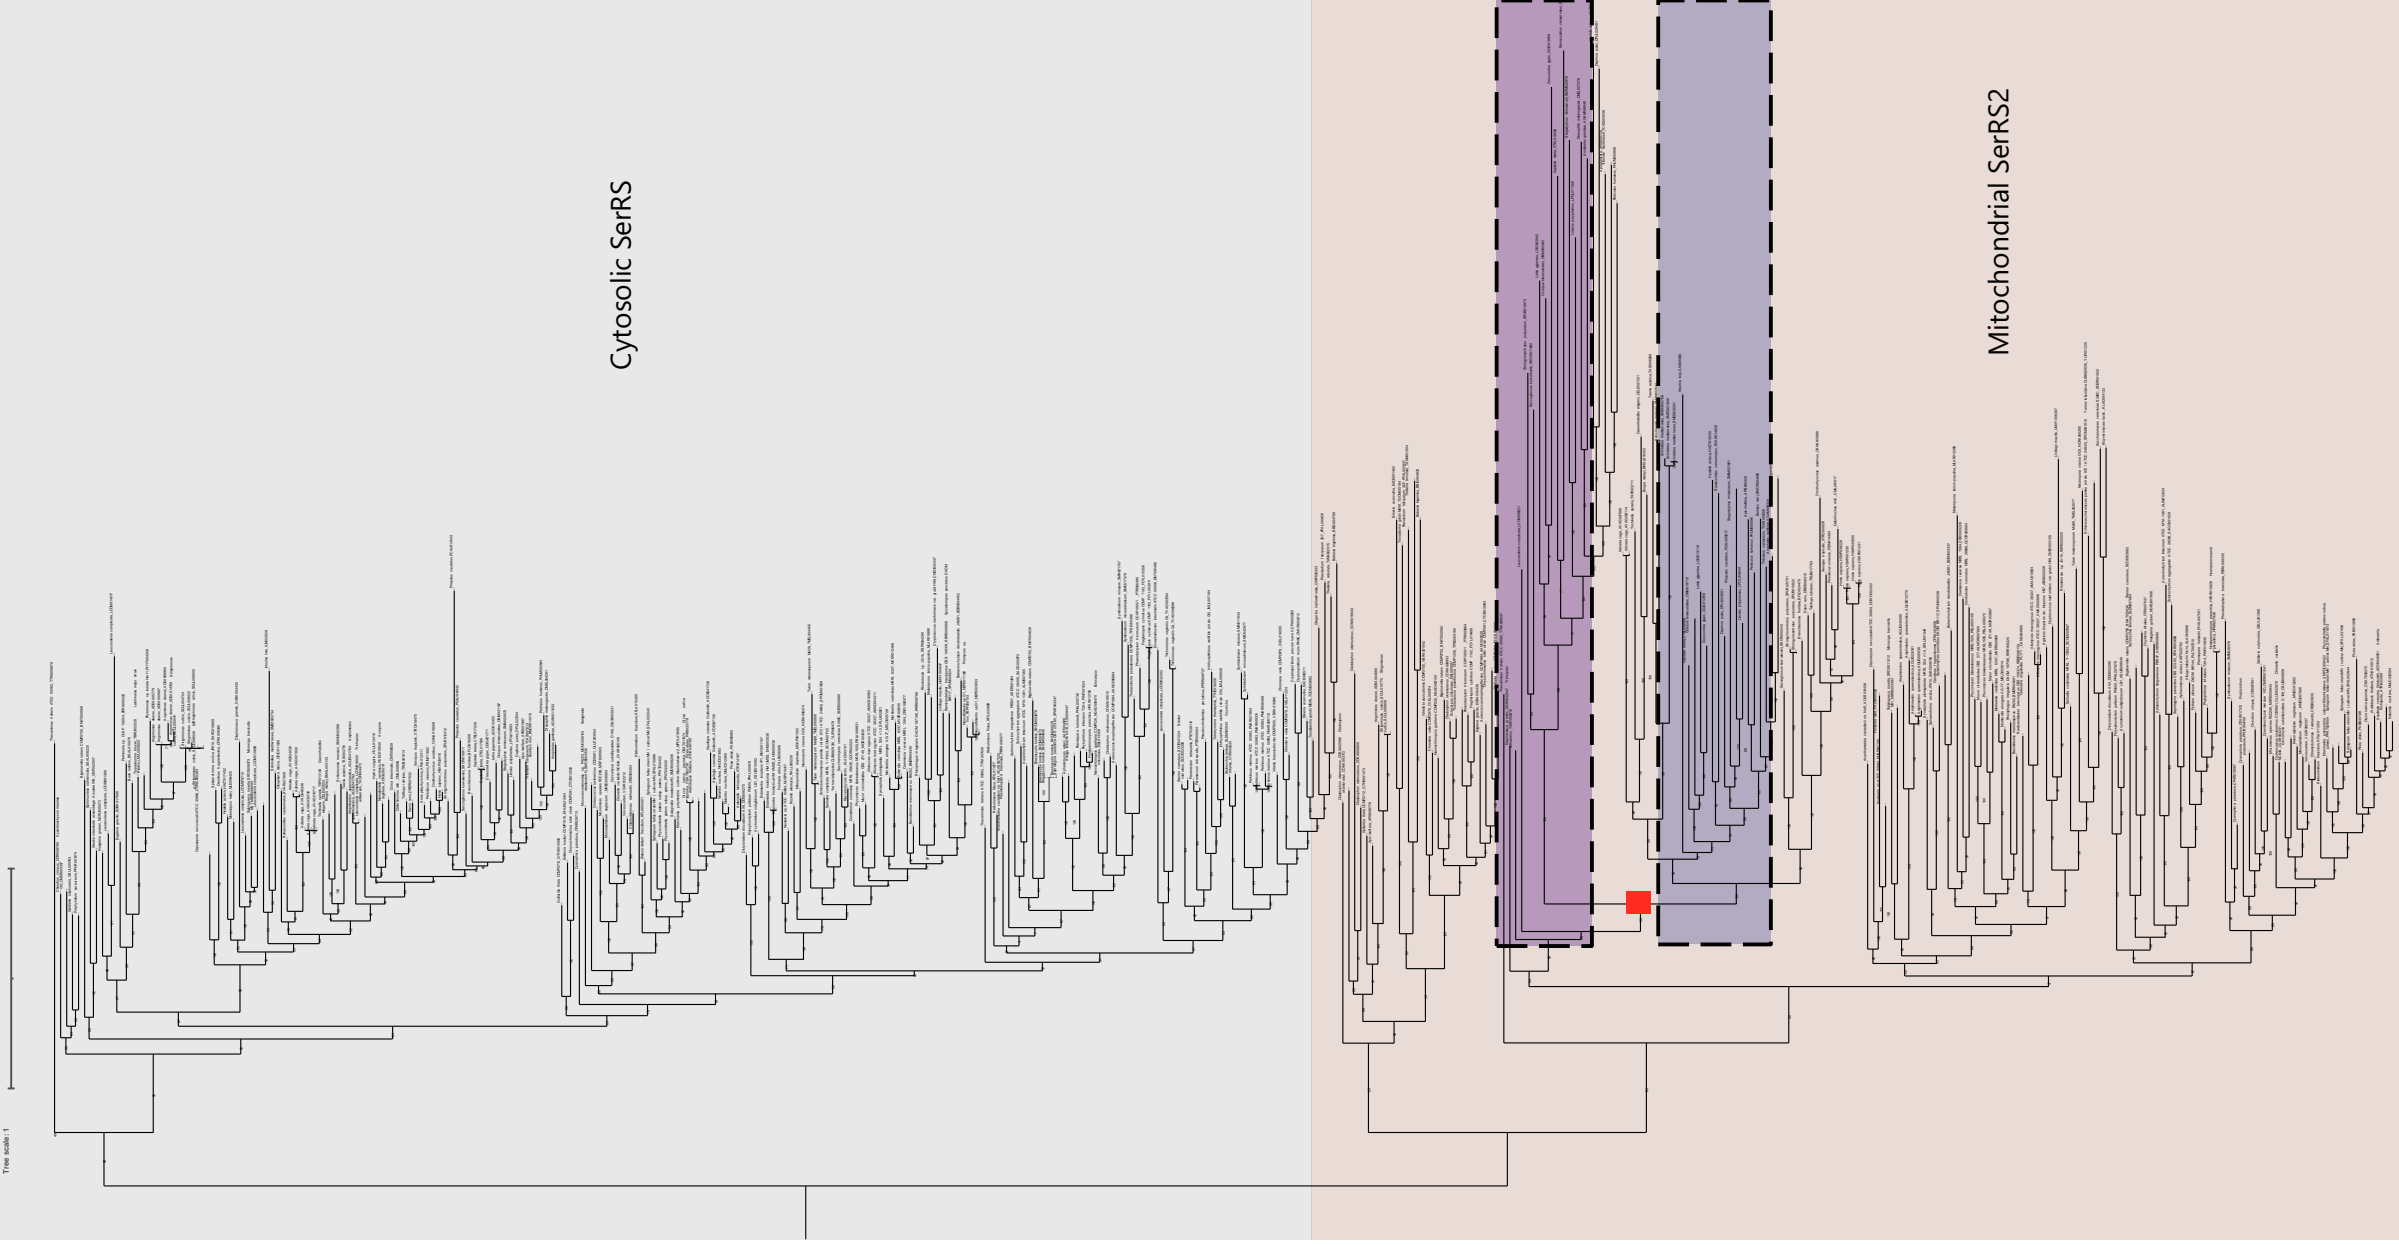

Duplication node

## Supplementary Figure 2

|                                              |                                                                |     |
|----------------------------------------------|----------------------------------------------------------------|-----|
| <i>Drosophila_melanogaster_SLIMP</i>         | LSKVAEERERVTKRL----KELTKS---GSSAVQLEELKEHGKSLRNELKALKQOTLYPIE  | 137 |
| <i>Acanthaster_planci_SLIMP</i>              | KSCIEDRRSKVNEIDI----KRLRKK---GGAKEQKDKLQQMGSLSREELRQINF'SIASLS | 196 |
| <i>Strongylocentrotus_purpuratus_SLIMP</i>   | KNQMERKKKALNTRA----KELSKQ---KGSVTKQEKVQLEGRKIREEVKSLN'TSLNGLM  | 191 |
| <i>Triboleum_casteum_SLIMP</i>               | KTVLEFTRSEIQNLI----NKLKQDGEE--KNQSDIEKLLHIIKVVKDDLKNVKEFTYGLE  | 133 |
| <i>Stegodyphus_mimosarum_SLIMP</i>           | YQEIVEKEEEYQKEL----ERLQSLDL--ET--EIKDITEKRIALSQNLRLKEKEKLYDVE  | 156 |
| <i>Ramazzottius_varieronatus_SLIMP</i>       | RAELETRRKQSVENF-----SKPSDVDEESKLGKGRLLRGEIKQLNKDIAEIE          | 168 |
| <i>Pediculus_humanus_SLIMP</i>               | KLQLEKRKTQIADNI----KDLKKIGNDGEAKQEMEKLKIEGRIVREDLKTLMKAFWEVE   | 140 |
| <i>Octopus_bimaculoides_SLIMP</i>            | KKKLEEEERKNIASMM----AALSKVKETEDVKRSKELLKSRGKSLRQLLKTNLNADFNILE | 178 |
| <i>Limulus_polyphemus_SLIMP</i>              | LQELLRRKENISQKL----QELSKTNH--ITSEEKENWVKVEGRKVRREEIKHVTEKMWDYE | 160 |
| <i>Lottia_gigantea_SLIMP</i>                 | KCDFESERKDIGKRVTELINLMKKSSENDNLVKSVDVLKSRGNKLLKLEKELSDRYFAIK   | 173 |
| <i>Hyalella_azteca_SLIMP</i>                 | IEELEKQADELTVTS----NEMK-----GKEDVKDDEVKVRISQLRSKTKILKARLNELE   | 347 |
| <i>Daphnia_pulex_SLIMP</i>                   | REDLETRRIEVTQLM----KQVASHTADTTRPNKIEEVKQEGIRLRTQLKELTKVWWDVE   | 63  |
| <i>Capitella_teleta_SLIMP</i>                | KDLLEKQHKELSRGFAELVRAKK---NDDIAKEAKKELSEKGRELRPRLKAAITSYYEAE   | 226 |
| <i>Anopheles_gambiae_SLIMP</i>               | KKEIEQYRVDLQKRI----Q----Q---SSSKEEQQLKSRAVLARDDLKMLKEQSYKVA    | 127 |
| <i>Drosophila_melanogaster_SerRS2a</i>       | -----HKL                                                       | 75  |
| <i>Acanthaster_planci_SerRS2a</i>            | LNDLQDEG-----SSPALANHLDDLKTQIRETE                              | 148 |
| <i>Strongylocentrotus_purpuratus_SerRS2a</i> | VHDVQLRLQTDIDK-----GLNTKELESMLKEKKNQLDRAQ                      | 160 |
| <i>Triboleum_casteum_SerRS2a</i>             | -----DKLYNATK                                                  | 82  |
| <i>Stegodyphus_mimosarum_SerRS2a</i>         | --D-----IEKCQILK                                               | 33  |
| <i>Ramazzottius_varieronatus_SerRS2a</i>     | -----                                                          | 0   |
| <i>Pediculus_humanus_SerRS2a</i>             | -----GKRETLW                                                   | 92  |
| <i>Octopus_bimaculoides_SerRS2</i>           | -----MKKQGLI                                                   | 113 |
| <i>Limulus_polyphemus_SerRS2a</i>            | --E-----ETERALLE                                               | 99  |
| <i>Lottia_gigantea_SerRS2a</i>               | --A-----SHK-DRIW                                               | 113 |
| <i>Hyalella_azteca_SerRS2a</i>               | -----SLNSVTSEDEL                                               | 87  |
| <i>Daphnia_pulex_SerRS2a</i>                 | -----SADQMELK                                                  | 82  |
| <i>Capitella_teleta_SerRS2a</i>              | SDR-----SEEFMSLQ                                               | 90  |
| <i>Anopheles_gambiae_SerRS2a</i>             | -----ESERGTLQ                                                  | 83  |
| <i>Homo_sapiens_SerRS2</i>                   | IRSLEEEKAAVTEAVRALLANQDSGEV--QQDPKYQGLRARGREIRKELVHLYPREAQLE   | 160 |
| <i>Bos_taurus_SerRS2</i>                     | IRSLEEEKEAVTEAVRALVVNQDNSQV--QQDPQYQSLRARGREIRKQLTLLYPKEAQLE   | 160 |
| <i>Danio_rerio_SerRS2</i>                    | ISHLEGRKQVVSSTVRELVGKHDKSTL--SSLEEYGHAREEGRAIREKLNQLYLQEKLE    | 186 |
| <i>Xenopus_tropicalus_SerRS2</i>             | IKTLEEEKSAIAKEVKHVMVISEEKQNL--QTNPRYALIRKRGKDIRLELSTLYKEESNLE  | 233 |
| <i>Caenorhabditis_elegans_SerRS2</i>         | GEK----Q-----TNGAVSEQKYKQLW                                    | 106 |
| <i>Trichinella_spiralis_SerRS2</i>           | KNP-----TMTMNELTSMW                                            | 82  |

Full-length sequence alignment of SerRS2, SLIMP, and SerRS2 $\alpha$  metazoan sequences (labeled accordingly).

# Supplementary Figure 2

|                                              |                                                                |     |
|----------------------------------------------|----------------------------------------------------------------|-----|
| <i>Drosophila_melanogaster_SLIMP</i>         | DDFIH-DYLHLPLNLLHVQCVPVGEEK-----LLYRHGIP-K-----S-----          | 172 |
| <i>Acanthaster_planci_SLIMP</i>              | DEFYP-AVLKLPNKLHPAVSLFFQTQPCGSMLKILETFGTD-K-EEKSDKP-----       | 244 |
| <i>Strongylocentrotus_purpuratus_SLIMP</i>   | NRLYP-LALALPNSLHNAVVPV-----DENVVKETVGDG-L-VSLE-----            | 229 |
| <i>Triboleum_casteum_SLIMP</i>               | ENANL-GVLSLPNFLHPKTPPLDSQTI-----I-HEFLEQ-P-----K-----          | 167 |
| <i>Stegodyphus_mimosarum_SLIMP</i>           | DIVMP-KLQKIPNLIDAATPTQFDT-----ADICQK-S-PDFEFKV-----            | 194 |
| <i>Ramazzottius_varieronatus_SLIMP</i>       | IDTIT-TLLKLPVRLHXYVPMGNPF-----VSFDTTAD-QEVQFMECSKLNNSVNA       | 219 |
| <i>Pediculus_humanus_SLIMP</i>               | EKVIM-KGLSLPNELHKDTPDGEDKI-----V-HQYKDR-P-----I-----           | 174 |
| <i>Octopus_bimaculoides_SLIMP</i>            | ETVIM-RSLKLPNVLHRDTPSDEVKI-----LQETVLEK-DLADFA-----            | 217 |
| <i>Limulus_polyphemus_SLIMP</i>              | DDAIP-VLLSIPNNIHPDTPLODDDI-----I-GNFCSN-N-QDNCIQN-----         | 200 |
| <i>Lottia_gigantea_SLIMP</i>                 | HAVML-DGLKIPNRIHPETPTSAQIL-----RSF-----G-NIMDFSK-----          | 209 |
| <i>Hyalella_azteca_SLIMP</i>                 | VTAIP-AMLDLPNTVNLPPGDGGVV-----VSLNDP-PIFDFSPKP-----            | 386 |
| <i>Daphnia_pulex_SLIMP</i>                   | ETAVT-RALSLPNSLHSETPIEDSRE-----L-YSFIPP-K-----S-----           | 97  |
| <i>Capitella_teleta_SLIMP</i>                | NTFNL-MALKLPVELAPETQPDSTL-----AELGVK-AAES--QKSHLEL--L-G        | 270 |
| <i>Anopheles_gambiae_SLIMP</i>               | DAFIANSFLSIPNDLHERTPPEGAKC-----I-YEKPVP-P-----R-----           | 162 |
| <i>Drosophila_melanogaster_SerRS2a</i>       | RQLQA-ELEQLPNATHPRLR-DYGEE-----PRELAQYVHRQLTPQSRLKEFSELAR---   | 125 |
| <i>Acanthaster_planci_SRS2a</i>              | DVFYQ-SAARLPNRTHPEVPMGGGDE-----PRLVMLIGEK-PSFNFPKSHVELGE---    | 198 |
| <i>Strongylocentrotus_purpuratus_SerRS2a</i> | NDFYR-IAVAIPNSIHPDVPLTEDAD-----PVLIEEINEK-RSFDFFIKGHVELGE---   | 210 |
| <i>Triboleum_casteum_SerRS2a</i>             | SEFET-EVLRIPNRTHPQVA-GYGDS-----PKTVEIVGT--KPPDSSHLDQEIICK---   | 130 |
| <i>Stegodyphus_mimosarum_SerRS2a</i>         | EKIAP-QLLWFPNLTHPKVLENKSEE-----PFLQKVGK-K-TAFTYFPTKFESLTK---   | 83  |
| <i>Ramazzottius_varieronatus_SerRS2a</i>     | -----M-----AAAVEVIGTK-QAFRFAPKSIETLAA---                       | 26  |
| <i>Pediculus_humanus_SerRS2a</i>             | QSLVK-EAGSLPNKTHPAVK-EYGER-----PRVLKSSEH--VTHSFI PKDFQELAK---  | 140 |
| <i>Octopus_bimaculoides_SerRS2</i>           | DKLKS-LAADI PNKIHPPLAPIGNESC-----NRVVKTFGKE-SVNVGKVKGVVEIGE--- | 163 |
| <i>Limulus_polyphemus_SerRS2a</i>            | EKLIS-EAAKLPNKTHPKVLENSDQ-----PVEVETVGSAPVFDKPKQFHELAL---      | 149 |
| <i>Lottia_gigantea_SerRS2a</i>               | KDLIK-EASDIPNTHHPDPSPIGEEEN-----SRLVETVGEPTRFNFKPRTVVRIGE---   | 163 |
| <i>Hyalella_azteca_SerRS2a</i>               | INMYK-NLSKLPNATCPIAE--ELSG-----PKIIGLFGTKRVLDDALML--EQLSH---   | 134 |
| <i>Daphnia_pulex_SerRS2a</i>                 | KTLA-EALKIPNNSHPRLH-AYGDA-----PHVVETPGEK-PNWSFKPLEFHSAK---     | 131 |
| <i>Capitella_teleta_SerRS2a</i>              | EKFHK-SAGVIPNMSHPDAPIGGEDK-----AILVETFGKEK-QDFDFAPKGVVEIGE---  | 140 |
| <i>Anopheles_gambiae_SerRS2a</i>             | AQLDA-ELAKLPNRTHPAVV-GYRTE-----PRIERYNEHAKRTDRKYFQFGDICK---    | 133 |
| <i>Homo_sapiens_SerRS2</i>                   | EQFYL-QALKLPNQTHPDVPGDESQ-----ARVLHMGVDK-PVFSFQPRGHLEIGE---    | 210 |
| <i>Bos_taurus_SerRS2</i>                     | EQFYL-RALRLPNQTHPDVPGDESQ-----ARVLHMGVDK-PAFSFQPRGHLEIAE---    | 210 |
| <i>Danio_rerio_SerRS2</i>                    | KEHYC-RALRLPNRTHPSVPIGDESQ-----ARVVEVVGEK-REFDFKPKGHLQIGE---   | 236 |
| <i>Xenopus_tropicalus_SerRS2</i>             | GSFYR-RALRLPNRTHPNTVPGDESK-----ARVLEVVGVK-PEFDFKICGHLEIGE---   | 283 |
| <i>Caenorhabditis_elegans_SerRS2</i>         | DELYD-EAILIPNMTQDGVPRGSEDQ-----AKIVAWEWGEKREDECLTAEKLVQ-----   | 154 |
| <i>Trichinella_spiralis_SerRS2</i>           | DRFYE-EALLIPNDTHPEAPVGDSESV-----AKI IHTNGSK-PIFTFKPLFGEDIAV--- | 132 |

# Supplementary Figure 2

|                                               |                                                                                                                                                               |     |
|-----------------------------------------------|---------------------------------------------------------------------------------------------------------------------------------------------------------------|-----|
| <i>Drosophila melanogaster</i> _SLIMP         | -----ENKTTS----HLARQELVHFVDN <b>NR</b> YYLMEQAALFDV <b>NAMQ</b> SLARYFV                                                                                       | 216 |
| <i>Acanthaster planci</i> _SLIMP              | -----KEQS--PNI <sup>FL</sup> TESHPMSHG <b>GY</b> AYLEHEAALLELAL <b>TQ</b> --WVKQQL                                                                            | 286 |
| <i>Strongylocentrotus purpuratus</i> _SLIMP   | -----SRK--EHPSI <sup>STHHP</sup> MVHP <b>GY</b> CYTEGELVIKELDLVL--SAASHL                                                                                      | 270 |
| <i>Triboleum castaeum</i> _SLIMP              | -----PIQ--ENHL--QIAKSQNLIEY <b>TSPT</b> LCYLKSDAALFEFAIT <b>N</b> --YFQSNL                                                                                    | 212 |
| <i>Stegodyphus mimosarum</i> _SLIMP           | -----ISHAEL--GKLM <b>S</b> LLEF <b>S</b> NNDP <b>TV</b> YYMKGK <b>L</b> SELELATQ <b>I</b> --YFSDKL                                                            | 238 |
| <i>Ramazzottius varieronatus</i> _SLIMP       | ANRVARREKVRVEAHDVNKA--LQQSRLVEY <b>TDEAP</b> <b>RG</b> YFLRGQA <b>E</b> LELKL <b>LN</b> --YGRSFL                                                              | 277 |
| <i>Pediculus humanus</i> _SLIMP               | -----INQKYSHL--DIGQKQNLIDYRDP <b>SL</b> CYLK <b>SE</b> AALFELAT <b>S</b> --YFSEGL                                                                             | 220 |
| <i>Octopus bimaculoides</i> _SLIMP            | -----QVNHVVA--GEQYNWIKFSNIG <b>P</b> AYFLLG <b>PL</b> AWSERHF <b>IN</b> --HFSENL                                                                              | 262 |
| <i>Limulus polyphemus</i> _SLIMP              | -----LKACRSHL--QVLPNDIQFSNV <b>SP</b> CSYYLTRNAALLELAL <b>IY</b> --FFSHHL                                                                                     | 246 |
| <i>Lottia gigantea</i> _SLIMP                 | -----SRSHIEI--GREKDLIKFSDIG <b>PK</b> SFY <b>LK</b> GD <b>LAL</b> CELELID--KTKKFL                                                                             | 254 |
| <i>Hyalella azteca</i> _SLIMP                 | -----H---TLLR--TQSPNSLEFLDV <b>SP</b> GA <b>F</b> YLSGD <b>LAE</b> CEVLLDR--YWTGLL                                                                            | 429 |
| <i>Daphnia pulex</i> _SLIMP                   | -----AHS---PS--DSTKLDVKFVSH <b>SP</b> TA <b>F</b> YMRGLSARLELN <b>W</b> MR--NFSNDW                                                                            | 140 |
| <i>Capitella teleta</i> _SLIMP                | GSGIH----LRYV---FPAS--SPHINTPCPSDI <b>SP</b> GA <b>Y</b> YLTGNVSN <b>S</b> ERQLVQ--WTKKFM                                                                     | 321 |
| <i>Anopheles gambiae</i> _SLIMP               | -----AATSNRPS--NVD <b>P</b> VQE <b>Q</b> LEEF <b>GP</b> ACLYMTGDAAWMDLRL <b>PM</b> --YCSELF                                                                   | 208 |
| <i>Drosophila melanogaster</i> _SerRS2a       | -----AL--NLYRMDHLGNY <b>TGH</b> K <b>S</b> YYLT <b>G</b> QLATLE <b>Q</b> AI <b>I</b> Q--YALQAV                                                                | 165 |
| <i>Acanthaster planci</i> _SRS2a              | -----HL--DIIRIKNLGHV <b>TGH</b> R <b>S</b> YFFKGAAAMLEHAL <b>IC</b> --FTVDRL                                                                                  | 238 |
| <i>Strongylocentrotus purpuratus</i> _SerRS2a | -----DL--DIIRLKNLGH <b>T</b> T <b>GH</b> R <b>S</b> YFLKGAGSMLE <b>D</b> ALVR--FTLDRL                                                                         | 250 |
| <i>Triboleum castaeum</i> _SerRS2a            | -----KL--RLRTDQIGN <b>F</b> CG <b>S</b> K <b>S</b> YFLGELAELEHALVR--YVTSKL                                                                                    | 170 |
| <i>Stegodyphus mimosarum</i> _SerRS2a         | -----RL--NVLRTKHLGHMS <b>G</b> S <b>K</b> SYFLKNDLSLLE <b>Q</b> ALVR--FALS <b>K</b> L                                                                         | 123 |
| <i>Ramazzottius varieronatus</i> _SerRS2a     | -----GYAGSLRR <b>T</b> KL <b>S</b> LL <b>ST</b> D <b>RAY</b> ILGGLFAKLE <b>Q</b> AL <b>S</b> --FTTGFL                                                         | 67  |
| <i>Pediculus humanus</i> _SerRS2a             | -----DL--KLLR <b>M</b> EDL <b>T</b> VAG <b>Q</b> R <b>S</b> YFF <b>T</b> GD <b>L</b> ADLE <b>Q</b> AL <b>I</b> K--Y <b>T</b> ISRL                             | 180 |
| <i>Octopus bimaculoides</i> _SerRS2           | -----KA--GWLRTSNV <b>G</b> TT <b>TG</b> Q <b>R</b> SYFL <b>N</b> QLARLELAL <b>V</b> N--YCLDKL                                                                 | 203 |
| <i>Limulus polyphemus</i> _SerRS2a            | -----KL--DMLR <b>M</b> ENLGLV <b>TGH</b> R <b>S</b> YYL <b>K</b> RELA <b>Q</b> LE <b>Q</b> AL <b>L</b> H--F <b>S</b> VKRL                                     | 189 |
| <i>Lottia gigantea</i> _SerRS2a               | -----KL--DILRTDNV <b>N</b> F <b>ST</b> GI <b>R</b> TY <b>F</b> Y <b>K</b> DELVDLE <b>M</b> AL <b>I</b> K--FTLN <b>T</b> L                                     | 203 |
| <i>Hyalella azteca</i> _SerRS2a               | -----HGVD <b>M</b> N <b>M</b> TGN <b>F</b> T <b>G</b> S <b>R</b> SYYL <b>R</b> G <b>S</b> MAHLE <b>S</b> KL <b>T</b> Q--YALEHL                                | 172 |
| <i>Daphnia pulex</i> _SerRS2a                 | -----DL--DLLR <b>T</b> ENLGN <b>L</b> T <b>G</b> P <b>R</b> SYYL <b>I</b> KEL <b>A</b> QLE <b>Q</b> AL <b>I</b> H--FTVDAL                                     | 171 |
| <i>Capitella teleta</i> _SerRS2a              | -----KL--GVLRTQNV <b>T</b> Y <b>T</b> T <b>G</b> P <b>R</b> SYY <b>F</b> MG <b>D</b> LAELE <b>D</b> AL <b>V</b> E--FT <b>I</b> SRL                            | 180 |
| <i>Anopheles gambiae</i> _SerRS2a             | -----RM--NLYR <b>M</b> ENLGN <b>F</b> T <b>G</b> H <b>R</b> SYYL <b>T</b> DE <b>L</b> AEL <b>E</b> HAL <b>I</b> C--Y <b>A</b> VDSL                            | 173 |
| <i>Homo sapiens</i> _SerRS2                   | -----KL--DIIRQ <b>R</b> L <b>S</b> HV <b>S</b> GH <b>R</b> SYYL <b>R</b> GAGAL <b>L</b> Q <b>H</b> GL <b>V</b> N--F <b>T</b> F <b>N</b> KL                    | 250 |
| <i>Bos taurus</i> _SerRS2                     | -----KL--DIIRQ <b>R</b> L <b>S</b> HV <b>S</b> GH <b>R</b> SYYL <b>R</b> GAGAL <b>L</b> Q <b>H</b> GL <b>V</b> N--F <b>T</b> L <b>N</b> KL                    | 250 |
| <i>Danio rerio</i> _SerRS2                    | -----SL--DIIRQ <b>R</b> L <b>S</b> HV <b>S</b> GH <b>R</b> SYYL <b>R</b> GAG <b>A</b> Q <b>L</b> Q <b>F</b> AL <b>Q</b> N--F <b>A</b> MD <b>L</b> L           | 276 |
| <i>Xenopus tropicalis</i> _SerRS2             | -----DL--DIIRQ <b>R</b> L <b>S</b> HV <b>S</b> GH <b>R</b> SYYL <b>R</b> GAG <b>S</b> L <b>L</b> Q <b>H</b> AL <b>V</b> N--F <b>T</b> I <b>S</b> KL           | 323 |
| <i>Caenorhabditis elegans</i> _SerRS2         | -----TW <b>R</b> SL <b>L</b> H <b>P</b> T <b>D</b> AS <b>G</b> Q <b>R</b> S <b>V</b> FL <b>G</b> ALASLE <b>K</b> AL <b>L</b> D--Y <b>A</b> HER <b>V</b>       | 192 |
| <i>Trichinella spiralis</i> _SerRS2           | -----K <b>F</b> --K <b>I</b> L--WQDV <b>G</b> FCC <b>G</b> E <b>K</b> A <b>Y</b> FL <b>N</b> Q <b>L</b> A <b>I</b> LELAL <b>I</b> R--F <b>C</b> R <b>D</b> RL | 171 |

# Supplementary Figure 2

|                                              |                                                              |     |
|----------------------------------------------|--------------------------------------------------------------|-----|
| <i>Drosophila_melanogaster_SLIMP</i>         | N-HGHFIQTANPDFVRCVLL---EANATPL--SDYHLVQE-----EHL-----        | 253 |
| <i>Acanthaster_planci_SLIMP</i>              | L-DQGFTPPLSCPAMYKSIAL---ESLGLDP--DNSNETYAIET-----            | 323 |
| <i>Strongylocentrotus_purpuratus_SLIMP</i>   | T-SNGFTRFAMPDMYKPLLR---EALGLNA--EEFNETYAIQT-----             | 307 |
| <i>Triboleum_casteum_SLIMP</i>               | V-SQSFTQFSNADFVRSLVV---EGCGTDY--LDKNKIFTLDGS--NNE-----       | 253 |
| <i>Stegodyphus_mimosarum_SLIMP</i>           | I-SLSYAPLSCVDFCKSFII---EAVGLDP--HSNADCIP LKS---KSS-----      | 278 |
| <i>Ramazzottius_varieronatus_SLIMP</i>       | E-EKGYSGISGPHLYRSVVV---EGTGFIS--DDHDDVSATTGSLINVKPNQPFLIDTVD | 331 |
| <i>Pediculus_humanus_SLIMP</i>               | K-ADEYI PFSNPDFVRSLVV---EGCGADH--SDPNSIFTVLLP--NEK-----      | 261 |
| <i>Octopus_bimaculoides_SLIMP</i>            | I-QNGFQMMVCPEIFKAVVV---EGCGVDI--TDTGKIYTLEN---NEE-----       | 302 |
| <i>Limulus_polyphemus_SLIMP</i>              | A-DAGL TEISCPDIVKSVIV---EGCGNSF--MSSIS-----LIS-----          | 280 |
| <i>Lottia_gigantea_SLIMP</i>                 | Q-QNGMTTFLLPDKVRSIIM---EGCGFDV--DSDKILTIHDP---DPR-----       | 294 |
| <i>Hyalella_azteca_SLIMP</i>                 | D-AAGYL RQCNP DFAKEVLV---EGCGGAS--SLKTQL-----K-----          | 462 |
| <i>Daphnia_pulex_SLIMP</i>                   | I-SKGYNLISPPDFVRS LIV---DGCGLDF--NNPQKVL SLATVPDHGS-----     | 183 |
| <i>Capitella_teleta_SLIMP</i>                | N-DLSIPRISCP ELFREAIV---EGCGFTD--EEHISHAC-----               | 355 |
| <i>Anopheles_gambiae_SLIMP</i>               | R-RNKCILFCNP D FVRSFLV---EAAMVSK--ESLFLVQE-----EDEP-----     | 246 |
| <i>Drosophila_melanogaster_SerRS2a</i>       | T-EHGFKLISVPDILPKEVI---ESCGMRT-EGERTQVYKLD T-----            | 203 |
| <i>Acanthaster_planci_SRS2a</i>              | L-GRGFRAISVPDLVHP I VF---EGCGMRT-KGLHTQVYQLDHRKH-----        | 279 |
| <i>Strongylocentrotus_purpuratus_SerRS2a</i> | IKNHGFKI IKVPDLIKPVV FVSIEACGMRT- EGLHTQVYPLSPEYH-----       | 295 |
| <i>Triboleum_casteum_SerRS2a</i>             | L-FNK FELVSVPDILPRGTI---EGCGMNT-KGARTQVYALDSTLH-----         | 211 |
| <i>Stegodyphus_mimosarum_SerRS2a</i>         | I-KKGFQMVSVPDVVSQTSF---EGCGMKT-DGKHSQVYHIEDSWA-----          | 164 |
| <i>Ramazzottius_varieronatus_SerRS2a</i>     | K-QRGFEFISVPDIISPEVL---DGCGERL KGRHNMIYLLDEQRH-----          | 109 |
| <i>Pediculus_humanus_SerRS2a</i>             | L-KKNFQLISVPDILPMEVL---ERCGMTP-NALQTQVYQLDES-H-----          | 220 |
| <i>Octopus_bimaculoides_SerRS2</i>           | R-LEGFQLVSVPEILRPEII---EGCGFKT-TGQRTQVYKLD A KRH-----        | 244 |
| <i>Limulus_polyphemus_SerRS2a</i>            | M-SKGF TLVSVPDILHPSAI---EACGM TT-QGKRTQVYHLEPNFG-----        | 230 |
| <i>Lottia_gigantea_SerRS2a</i>               | K-QHGFHVISVPDLIYAPVI---EACGFKT--TGENQVYKLNDNFY-----          | 243 |
| <i>Hyalella_azteca_SerRS2a</i>               | K-RKGFKLMSVPDLVTE DIL---ESCGVPV-HGERTMVYSVSPSHLGLP-----S     | 217 |
| <i>Daphnia_pulex_SerRS2a</i>                 | E-KKGFILYSVPDLLHSRLI---ESCGMDT-KSERTQVYKLEPKFY-----          | 212 |
| <i>Capitella_teleta_SerRS2a</i>              | Q-AMGFCVISVPNLLHSSVI---EGCGFQV-QGERTQVYRSQ--DD-----          | 219 |
| <i>Anopheles_gambiae_SerRS2a</i>             | R-QRNFQLVTVPDVLPGR I I---ESCGMSV-HGERNQVYKLGHRDG-----        | 214 |
| <i>Homo_sapiens_SerRS2</i>                   | L-RRGFTPMTVPD L LRGA VF---EGCGMTP-NANPSQIYNIDPARF-----       | 291 |
| <i>Bos_taurus_SerRS2</i>                     | I-HRGFTPM TVPD L LRGVVF---EGCGMTP-NAKPSQIYNIDPSRF-----       | 291 |
| <i>Danio_rerio_SerRS2</i>                    | Q-KRGFIPMVVPDILKSVVF---EGCGMQP-HAQKSQVYSLNPKRS-----          | 317 |
| <i>Xenopus_tropicalus_SerRS2</i>             | V-KKGFIPMSVPDMLRGAVF---EGCGMQA-DAHASQVYSDVPLQH-----          | 364 |
| <i>Caenorhabditis_elegans_SerRS2</i>         | C-ALGFRPITVPDIVSGEVT---QACGVMQ-RSDHPIQYTLAGEES-----          | 233 |
| <i>Trichinella_spiralis_SerRS2</i>           | R-SSGYEEVVVPDVI PKRIV---ENCGLMN-RTDKEIVYSIHGL-----           | 210 |

# Supplementary Figure 2

|                                              |                                                                                                                   |     |
|----------------------------------------------|-------------------------------------------------------------------------------------------------------------------|-----|
| <i>Drosophila_melanogaster_SLIMP</i>         | -QNKINTAYLTGG <b>ASF</b> ESYLGAMTKLCVYPS-----VLPLRYVCCGRSY <b>NRAE</b>                                            | 300 |
| <i>Acanthaster_planci_SLIMP</i>              | ----HENVQYLAG <b>VSSL</b> AFVAYFMMSVVEAS-----DLPYRCFTVGRSY <b>KQHQ</b>                                            | 367 |
| <i>Strongylocentrotus_purpuratus_SLIMP</i>   | ----RENLMHLAG <b>TS</b> PMGFLAYYMNSVLEAS-----DLPQRCFAVGRHY <b>NAAA</b>                                            | 351 |
| <i>Triboleum_casteum_SLIMP</i>               | ----INRLHLVGG <b>AS</b> LYSFMAYFAKNSIQSA-----LLPLKFFTLGRKY <b>SPGS</b>                                            | 297 |
| <i>Stegodyphus_mimosarum_SLIMP</i>           | -RESGQKLNLVGG <b>AS</b> LEMFCAYLTNMNVDKS-----SFPLRYYSLGRRY <b>NAQN</b>                                            | 325 |
| <i>Ramazzottius_varieronatus_SLIMP</i>       | TRGSLFRSLFLT <b>NST</b> VNLYAAHFTNCEAAEN-----ILPIRLHSSSRVY <b>RAVS</b>                                            | 379 |
| <i>Pediculus_humanus_SLIMP</i>               | -VQPNYRLHLVGG <b>AS</b> IYPFCAFHTKYTIGFS-----SLPLKYFTVGRQY <b>KPTL</b>                                            | 308 |
| <i>Octopus_bimaculoides_SLIMP</i>            | -TMKIEHICHFIG <b>VSP</b> MSFAAFWTRMTVDCE-----ATPQTYFTIGKCY <b>HPVV</b>                                            | 349 |
| <i>Limulus_polyphemus_SLIMP</i>              | -EQKGAMSI <b>L</b> TGG <b>AS</b> FESLIAYFTRSIVEKT-----SLPLTFFSVGRCY <b>QSLN</b>                                   | 327 |
| <i>Lottia_gigantea_SLIMP</i>                 | -ESKVIDEHHLQ <b>NS</b> VQSFVAFLMRQMVDNS-----QLPLKYFSVGSRY <b>VSG</b>                                              | 340 |
| <i>Hyalella_azteca_SLIMP</i>                 | -EEDKTPVYLVGG <b>AS</b> LPAYLGYFARRAVKKT-----SKFLPQKLYACQRTY <b>TPLR</b>                                          | 511 |
| <i>Daphnia_pulex_SLIMP</i>                   | -LEKGNGFHLVGG <b>SSL</b> PAMVAFLTKNAIEE-----PIPLRLASAGRTY <b>HPPT</b>                                             | 229 |
| <i>Capitella_teleta_SLIMP</i>                | -----IFMRLIFPFN-----ATHRR-----                                                                                    | 370 |
| <i>Anopheles_gambiae_SLIMP</i>               | -VDKVNLLHL <b>CGGS</b> LLSFLGYFTKLSVFPSS-----ALPLRLVASGKRY <b>HFE</b>                                             | 292 |
| <i>Drosophila_melanogaster_SerRS2a</i>       | -----GECLSG <b>TSEM</b> ALAGFFANKLLSED-----QLPLKVTAVSR <b>CYRAET</b>                                              | 244 |
| <i>Acanthaster_planci_SerRS2a</i>            | -----NMDLCLSG <b>TA</b> EVGIAGYFMDTVLDVA-----ELPQKKFAISQ <b>CFRAET</b>                                            | 322 |
| <i>Strongylocentrotus_purpuratus_SerRS2a</i> | -----NSDLWLAG <b>TA</b> EVGIAGYLMNKTIPMA-----ELPLRIA <b>AVSR</b> CYRAET                                           | 338 |
| <i>Triboleum_casteum_SerRS2a</i>             | -----GPDWCLSG <b>TSEM</b> ALAGYLSNKTTLNSD-----ILPLKLA <b>AVSR</b> CYRAET                                          | 254 |
| <i>Stegodyphus_mimosarum_SerRS2a</i>         | -----PRLCLSG <b>TSE</b> I <b>AL</b> ASHFSQKTFQNS-----NLPLKL <b>CAAS</b> R <b>CYRAEA</b>                           | 206 |
| <i>Ramazzottius_varieronatus_SerRS2a</i>     | -----GRFALSG <b>TSEM</b> A <b>IA</b> ALHRNKIHRD-----QLPIKLS <b>AMSR</b> CYRAEV                                    | 151 |
| <i>Pediculus_humanus_SerRS2a</i>             | -----GQNI <b>AL</b> SG <b>TSEM</b> ALAAMNSNVVFNLK-----DLPVN <b>LA</b> AVSR <b>CFRSEV</b>                          | 263 |
| <i>Octopus_bimaculoides_SerRS2</i>           | -----GSA <b>CL</b> SG <b>TSEM</b> ALAGYFQ <b>NQ</b> EFSLQ-----DLP <b>IKL</b> TAVSR <b>CHRAEI</b>                  | 286 |
| <i>Limulus_polyphemus_SerRS2a</i>            | -----GDLCLSG <b>TA</b> EMAFGAFFANKTL <b>SLN</b> -----ELPQK <b>LA</b> AVSR <b>CFRAET</b>                           | 272 |
| <i>Lottia_gigantea_SerRS2a</i>               | -----QDVCLAG <b>TA</b> EMSLAGFMSDEKLTTE-----NLPTK <b>L</b> TAVSR <b>CFRREA</b>                                    | 285 |
| <i>Hyalella_azteca_SerRS2a</i>               | PSKEESKKVCLSG <b>TSEM</b> ALGGWLRNHSFTEE-----QLPLKL <b>CAV</b> SR <b>CYRAET</b>                                   | 265 |
| <i>Daphnia_pulex_SerRS2a</i>                 | -----GDICL <b>SG</b> <b>TA</b> EMALASYFTGS <b>AV</b> PVS-----ELP <b>IKM</b> AVSR <b>CYRAET</b>                    | 254 |
| <i>Capitella_teleta_SerRS2a</i>              | -----PSVCLAG <b>TG</b> EMPLAGYFM <b>NKQ</b> FDIK-----DLPQ <b>RV</b> ATVSR <b>CYRAET</b>                           | 261 |
| <i>Anopheles_gambiae_SerRS2a</i>             | -----REPLCLSG <b>TSEM</b> ALAGYLAGRVLPAD-----RLPQ <b>KL</b> MAVSR <b>CYRAET</b>                                   | 257 |
| <i>Homo_sapiens_SerRS2</i>                   | -----KDLNLAG <b>TA</b> EVGLAGYFMDHTVAFR-----DLPV <b>RM</b> VCS <b>STCYRAET</b>                                    | 333 |
| <i>Bos_taurus_SerRS2</i>                     | -----EDLNLAG <b>TA</b> EVGLAGYFMDH <b>S</b> VAFR-----DLP <b>I</b> ----- <b>STCYRAET</b>                           | 328 |
| <i>Danio_rerio_SerRS2</i>                    | -----PDLNLAG <b>TG</b> EVGVAGYFMDH <b>AV</b> NFK-----DLPV <b>RT</b> VCS <b>STCYRAET</b>                           | 359 |
| <i>Xenopus_tropicalus_SerRS2</i>             | -----PDLNLAG <b>TSE</b> VGIAGFFMDH <b>AV</b> MLQ-----DLPV <b>RT</b> VCC <b>STCYRAET</b>                           | 406 |
| <i>Caenorhabditis_elegans_SerRS2</i>         | -----HTKLSG <b>TA</b> EMG <b>IA</b> AF <b>LR</b> GR <b>TF</b> NQD-----QLP <b>IR</b> LV <b>SL</b> SR <b>CFRTEI</b> | 274 |
| <i>Trichinella_spiralis_SerRS2</i>           | -----PNWTL <b>SG</b> <b>TA</b> EMGLAS <b>F</b> IENR <b>IF</b> DVN-----EMP <b>KK</b> FFSVSR <b>CFRPEV</b>          | 252 |

# Supplementary Figure 2

|                                       |                                                                                                                                                                                                                                                                |     |
|---------------------------------------|----------------------------------------------------------------------------------------------------------------------------------------------------------------------------------------------------------------------------------------------------------------|-----|
| Drosophila_melanogaster_SLIMP         | ADL-----YGP <sup>I</sup> PSLY <b>T</b> ATQ <b>T</b> NAV <b>Q</b> IFVATQTD--NEADSQLEHILNLATD                                                                                                                                                                    | 344 |
| Acanthaster_planci_SLIMP              | ES-----TYFEG <b>LQ</b> ES <b>FQ</b> SQR <b>VEL</b> FGVCENT--EAASNALFNQFLSTARG                                                                                                                                                                                  | 410 |
| Strongylocentrotus_purpuratus_SLIMP   | ES-----AK <b>FQ</b> L <b>HQ</b> Y <b>QD</b> SR <b>LE</b> IFGVSEGA--EDSSNALLFQYLHIVTD                                                                                                                                                                           | 394 |
| Triboleum_casteum_SLIMP               | G-----P <b>DL</b> L <b>NLS</b> Q <b>N</b> TV <b>GQ</b> IFVATSNN--SNE---IFDSL <b>VQ</b> QIRE                                                                                                                                                                    | 333 |
| Stegodyphus_mimosarum_SLIMP           | -----R <b>VNS</b> Q <b>DLF</b> S <b>VVQ</b> S <b>TNI</b> H <b>S</b> VILCDQN---SEKEEFSAFFNSVLL                                                                                                                                                                  | 365 |
| Ramazzottius_varieronatus_SLIMP       | NK----G <b>LE</b> EEEE---DEKYCR <b>I</b> <b>R</b> PS <b>Q</b> T <b>H</b> TV <b>S</b> FCTAFTDA--ETTEEYLTETLELFKS                                                                                                                                                | 428 |
| Pediculus_humanus_SLIMP               | QE <b>Q</b> -----D <b>DE</b> SS <b>SGL</b> F <b>NL</b> W <b>Q</b> R <b>TC</b> V <b>DM</b> FALTADN--YNEMMSIFGKTLNIVIN                                                                                                                                           | 354 |
| Octopus_bimaculoides_SLIMP            | SS-----C <b>AN</b> M <b>GLY</b> N <b>T</b> S <b>Q</b> T <b>TK</b> C <b>EV</b> CSVCHDD--TMAD <b>NQ</b> F <b>Q</b> Q <b>FL</b> TMIWN                                                                                                                             | 391 |
| Limulus_polyphemus_SLIMP              | P <b>Q</b> -----Q <b>L</b> T <b>I</b> P <b>GL</b> F <b>S</b> V <b>PQ</b> R <b>TE</b> I <b>H</b> F <b>I</b> IACEES---NEKENFGKLVTL <b>LQ</b> Q                                                                                                                   | 369 |
| Lottia_gigantea_SLIMP                 | -----T <b>EL</b> P <b>GL</b> F <b>FG</b> H <b>Q</b> Y <b>AN</b> A <b>V</b> I <b>F</b> GASLSE--TESS <b>NL</b> F <b>Q</b> E <b>Y</b> SELIWS                                                                                                                      | 380 |
| Hyalabella_azteca_SLIMP               | DL <b>CP</b> P <b>DR</b> GL <b>HAP</b> HE <b>GLY</b> AP <b>Q</b> M <b>R</b> G <b>VMS</b> S <b>MQ</b> S <b>T</b> SV <b>S</b> L <b>L</b> T <b>MY</b> TNE--SKFKDLVKDEV <b>LGV</b> V <b>VQ</b>                                                                     | 570 |
| Daphnia_pulex_SLIMP                   | ES <b>N</b> -----H <b>E</b> ----D <b>L</b> T <b>N</b> T <b>Q</b> A <b>SS</b> I <b>H</b> L <b>L</b> T <b>VM</b> KNC--PDAM <b>F</b> KE <b>V</b> VR <b>VQ</b> ET <b>IS</b> M                                                                                      | 271 |
| Capitella_teleta_SLIMP                | -----W <b>F</b> T <b>L</b> Q <b>VD</b> M <b>F</b> SL <b>NK</b> SK--DESS <b>L</b> S <b>MA</b> E <b>L</b> A <b>F</b> N <b>I</b> T <b>Q</b>                                                                                                                       | 401 |
| Anopheles_gambiae_SLIMP               | -----S <b>AQ</b> S <b>NE</b> V <b>Q</b> V <b>F</b> GA <b>HT</b> TA--Q <b>G</b> A <b>V</b> E <b>L</b> F <b>D</b> E <b>M</b> V <b>Q</b> I <b>Y</b> Q <b>Q</b>                                                                                                    | 324 |
| Drosophila_melanogaster_SerRS2a       | S <b>G</b> L-----Q <b>E</b> E <b>K</b> G <b>I</b> <b>R</b> V <b>H</b> Q <b>F</b> N <b>K</b> V <b>E</b> M <b>F</b> A <b>I</b> C <b>T</b> E <b>E</b> ---Q <b>S</b> E <b>A</b> E <b>L</b> E <b>E</b> F <b>K</b> N <b>I</b> E <b>V</b> D                           | 286 |
| Acanthaster_planci_SRS2a              | T <b>H</b> S-----A <b>E</b> A <b>R</b> G <b>L</b> <b>Y</b> <b>R</b> V <b>H</b> Q <b>F</b> M <b>K</b> V <b>E</b> M <b>F</b> C <b>V</b> A <b>T</b> E <b>D</b> ---Q <b>S</b> E <b>Y</b> I <b>F</b> D <b>E</b> L <b>I</b> A <b>I</b> Q <b>R</b> D                  | 364 |
| Strongylocentrotus_purpuratus_SerRS2a | A <b>H</b> S-----A <b>D</b> A <b>R</b> G <b>L</b> <b>Y</b> <b>R</b> V <b>H</b> Q <b>F</b> T <b>K</b> V <b>E</b> M <b>F</b> C <b>V</b> A <b>A</b> N <b>E</b> S <b>G</b> K <b>E</b> S <b>E</b> Q <b>I</b> H <b>Q</b> E <b>L</b> V <b>G</b> I <b>E</b> R <b>E</b> | 383 |
| Triboleum_casteum_SerRS2a             | S <b>N</b> L-----L <b>E</b> E <b>R</b> G <b>I</b> <b>R</b> V <b>H</b> E <b>F</b> T <b>K</b> V <b>E</b> M <b>F</b> V <b>V</b> T <b>Q</b> P <b>Q</b> ---N <b>S</b> E <b>Q</b> A <b>E</b> D <b>I</b> L <b>K</b> L <b>E</b> M <b>D</b>                             | 296 |
| Stegodyphus_mimosarum_SerRS2a         | N <b>K</b> H-----Q <b>K</b> E <b>K</b> G <b>I</b> <b>F</b> R <b>V</b> H <b>H</b> <b>F</b> T <b>K</b> V <b>E</b> M <b>F</b> G <b>I</b> T <b>A</b> N <b>D</b> S <b>G</b> N <b>E</b> S <b>E</b> L <b>L</b> E <b>E</b> F <b>T</b> E <b>L</b> Q <b>K</b> E          | 251 |
| Ramazzottius_varieronatus_SerRS2a     | S <b>D</b> V-----Q <b>---</b> E <b>G</b> I <b>R</b> V <b>H</b> E <b>F</b> T <b>K</b> V <b>E</b> M <b>F</b> G <b>L</b> C <b>Q</b> P <b>D</b> ---D <b>S</b> K <b>T</b> M <b>L</b> E <b>E</b> F <b>V</b> T <b>I</b> Q <b>K</b> D                                  | 191 |
| Pediculus_humanus_SerRS2a             | S <b>H</b> F-----A <b>E</b> E <b>K</b> G <b>L</b> <b>Y</b> <b>R</b> V <b>H</b> Q <b>F</b> T <b>K</b> V <b>E</b> M <b>F</b> G <b>I</b> S <b>H</b> P <b>D</b> ---N <b>S</b> E <b>E</b> M <b>M</b> Q <b>N</b> F <b>V</b> D <b>I</b> Q <b>E</b> E                  | 305 |
| Octopus_bimaculoides_SerRS2           | S <b>E</b> L-----E <b>E</b> E <b>K</b> G <b>I</b> <b>R</b> V <b>H</b> N <b>F</b> T <b>K</b> V <b>E</b> M <b>F</b> S <b>V</b> V <b>A</b> Q <b>E</b> T <b>G</b> K <b>E</b> S <b>D</b> D <b>S</b> L <b>Q</b> E <b>F</b> I <b>D</b> L <b>Q</b> T <b>D</b>          | 331 |
| Limulus_polyphemus_SerRS2a            | S <b>T</b> V-----Q <b>E</b> E <b>K</b> G <b>I</b> <b>F</b> R <b>V</b> H <b>Q</b> <b>F</b> T <b>K</b> L <b>E</b> M <b>F</b> G <b>V</b> T <b>A</b> N <b>E</b> T <b>S</b> T <b>E</b> S <b>E</b> Q <b>L</b> L <b>D</b> E <b>F</b> T <b>T</b> I <b>Q</b> R <b>S</b> | 317 |
| Lottia_gigantea_SerRS2a               | S <b>D</b> A-----K <b>E</b> E <b>Q</b> G <b>I</b> <b>R</b> V <b>H</b> Q <b>F</b> T <b>K</b> I <b>E</b> M <b>F</b> G <b>V</b> T <b>E</b> N <b>D</b> K <b>G</b> T <b>E</b> S <b>E</b> L <b>L</b> Q <b>H</b> F <b>L</b> D <b>I</b> E <b>K</b> S                   | 330 |
| Hyalabella_azteca_SerRS2a             | S <b>K</b> L-----K <b>L</b> E <b>Q</b> G <b>I</b> <b>F</b> R <b>V</b> H <b>H</b> <b>F</b> T <b>K</b> V <b>E</b> M <b>F</b> G <b>I</b> T <b>S</b> N <b>E</b> T <b>G</b> Q <b>E</b> S <b>D</b> D <b>L</b> Y <b>Q</b> E <b>L</b> V <b>Q</b> I <b>Q</b> I <b>E</b> | 310 |
| Daphnia_pulex_SerRS2a                 | S <b>N</b> V-----Q <b>E</b> E <b>R</b> G <b>I</b> <b>R</b> V <b>H</b> Q <b>F</b> T <b>K</b> V <b>E</b> M <b>F</b> G <b>V</b> T <b>S</b> G <b>E</b> A <b>A</b> --A <b>S</b> D <b>A</b> L <b>L</b> E <b>E</b> F <b>V</b> A <b>I</b> Q <b>K</b> E                 | 298 |
| Capitella_teleta_SerRS2a              | S <b>T</b> V-----D <b>E</b> E <b>R</b> G <b>I</b> <b>F</b> R <b>V</b> H <b>Q</b> <b>F</b> T <b>K</b> V <b>E</b> M <b>F</b> G <b>V</b> T <b>A</b> N <b>E</b> S <b>G</b> E <b>E</b> S <b>S</b> Q <b>L</b> L <b>S</b> Q <b>L</b> I <b>E</b> I <b>Q</b> K <b>N</b> | 306 |
| Anopheles_gambiae_SerRS2a             | S <b>A</b> L-----Q <b>E</b> E <b>K</b> G <b>I</b> <b>R</b> V <b>H</b> Q <b>F</b> T <b>K</b> V <b>E</b> M <b>F</b> A <b>V</b> C <b>Q</b> P <b>G</b> ---Q <b>S</b> A <b>T</b> V <b>L</b> E <b>E</b> F <b>R</b> A <b>I</b> E <b>V</b> Q                           | 299 |
| Homo_sapiens_SerRS2                   | N <b>T</b> G-----Q <b>E</b> P <b>R</b> G <b>L</b> <b>Y</b> <b>R</b> V <b>H</b> H <b>F</b> T <b>K</b> V <b>E</b> M <b>F</b> G <b>V</b> T <b>G</b> P <b>G</b> --L <b>E</b> Q <b>S</b> S <b>Q</b> L <b>L</b> E <b>E</b> F <b>L</b> S <b>L</b> Q <b>M</b> E        | 377 |
| Bos_taurus_SerRS2                     | D <b>T</b> G-----K <b>E</b> P <b>W</b> G <b>L</b> <b>Y</b> <b>R</b> V <b>H</b> H <b>F</b> T <b>K</b> V <b>E</b> M <b>F</b> G <b>V</b> T <b>G</b> P <b>G</b> --L <b>E</b> Q <b>S</b> S <b>E</b> L <b>L</b> E <b>E</b> F <b>L</b> S <b>L</b> Q <b>M</b> E        | 372 |
| Danio_rerio_SerRS2                    | D <b>T</b> G-----R <b>E</b> T <b>W</b> G <b>L</b> <b>Y</b> <b>R</b> V <b>H</b> H <b>F</b> T <b>K</b> I <b>E</b> M <b>F</b> G <b>V</b> S <b>A</b> N <b>E</b> T <b>G</b> E <b>E</b> S <b>S</b> Q <b>L</b> L <b>D</b> Q <b>F</b> V <b>T</b> L <b>Q</b> K <b>E</b> | 404 |
| Xenopus_tropicalus_SerRS2             | D <b>T</b> G-----R <b>E</b> T <b>W</b> G <b>L</b> <b>Y</b> <b>R</b> V <b>H</b> H <b>F</b> T <b>K</b> V <b>E</b> M <b>F</b> G <b>V</b> T <b>A</b> N <b>E</b> S <b>G</b> I <b>E</b> S <b>Q</b> E <b>M</b> L <b>D</b> E <b>F</b> L <b>G</b> L <b>Q</b> K <b>E</b> | 451 |
| Caenorhabditis_elegans_SerRS2         | S <b>K</b> S-----A <b>S</b> E <b>A</b> K <b>L</b> <b>Y</b> <b>R</b> V <b>H</b> E <b>F</b> S <b>K</b> V <b>E</b> M <b>F</b> V <b>V</b> S <b>T</b> P <b>E</b> ---Q <b>S</b> A <b>A</b> E <b>L</b> D <b>Y</b> L <b>V</b> E <b>V</b> Q <b>K</b> G                  | 316 |
| Trichinella_spiralis_SerRS2           | A <b>T</b> G-----K <b>L</b> S <b>K</b> G <b>L</b> <b>Y</b> <b>R</b> V <b>H</b> E <b>F</b> T <b>K</b> V <b>E</b> M <b>F</b> I <b>C</b> T <b>A</b> N <b>E</b> T <b>G</b> L <b>E</b> S <b>N</b> I <b>S</b> H <b>L</b> E <b>I</b> L <b>E</b> M <b>Q</b> K <b>L</b> | 297 |
| Schistostoma_mansoni_SerRS2           | P <b>N</b> -----Q <b>E</b> P <b>T</b> L <b>Y</b> <b>R</b> V <b>H</b> Q <b>F</b> T <b>K</b> V <b>E</b> M <b>F</b> A <b>I</b> T <b>T</b> P <b>S</b> --L <b>P</b> V <b>S</b> D <b>A</b> M <b>F</b> N <b>Q</b> I <b>K</b> L <b>Q</b> I <b>C</b>                    | 338 |
| Intoshia_linea_SerRS2                 | S <b>P</b> L-----K <b>S</b> E <b>S</b> G <b>L</b> <b>Y</b> <b>R</b> V <b>H</b> D <b>F</b> S <b>K</b> V <b>E</b> M <b>F</b> G <b>I</b> T <b>E</b> N <b>S</b> --I <b>E</b> K <b>S</b> N <b>L</b> V <b>F</b> Q <b>E</b> F <b>L</b> N <b>I</b> Q <b>N</b> E        | 295 |

# Supplementary Figure 2

|                                              |                                                                        |     |
|----------------------------------------------|------------------------------------------------------------------------|-----|
| <i>Drosophila_melanogaster_SLIMP</i>         | FYKALDIPFRISYATAADLTPAESIRAVIEVYAPSL-----QRYV <b>CVGR</b> ISN          | 391 |
| <i>Acanthaster_planci_SLIMP</i>              | LLSLLPLHGRIVEVPSARLLPSMYRKAIEVWIPDA-----GKFV <b>EVAS</b> VSN           | 457 |
| <i>Strongylocentrotus_purpuratus_SLIMP</i>   | LITFDLPPFRVVEVSSRNLLPCMHRQMAVELWIPSE-----RNYI <b>EVAN</b> VCN          | 441 |
| <i>Triboleum_casteum_SLIMP</i>               | IYEPLNYHFRLVYAPAVDLKVGESLKVSIEMFSNYS-----GTYV <b>EVGY</b> LSL          | 380 |
| <i>Stegodyphus_mimosarum_SLIMP</i>           | CYQALGLPYRTVDVAAKNLIIITESRRKQLELWSPSF-----KKYV <b>PVAH</b> VSQ         | 412 |
| <i>Ramazzottius_varieronatus_SLIMP</i>       | FYLSLGLRFRVLVSLPASKLGISEALRYELKVWSPLL-----SEFV <b>PCGH</b> IAF         | 475 |
| <i>Pediculus_humanus_SLIMP</i>               | LYEQLGHHFRVVYVNASSLECWECRASIQMYSCHE-----QKYI <b>EVGN</b> ISI           | 401 |
| <i>Octopus_bimaculoides_SLIMP</i>            | FYSDLNLPVRLLLLPA SQLHVSESKKAI IEMWAPSQ-----QQYL <b>TVAS</b> VYL        | 438 |
| <i>Limulus_polyphemus_SLIMP</i>              | CYSLINLPFRIKKLASKNLGAAESLRIEFEVWAPAL-----NDYAL <b>CATI</b> IR          | 416 |
| <i>Lottia_gigantea_SLIMP</i>                 | FLESFNLPIRQILVVPVQDLSLSESLRSEFQMWSPSL-----EDFV <b>NMGY</b> LCM         | 427 |
| <i>Hyalella_azteca_SLIMP</i>                 | AYQKLGHLHFRIVRPEPRDLRVYERDALVVQMLSTSYPEGRNTVYIGENKMTYI <b>EVGR</b> ISI | 630 |
| <i>Daphnia_pulex_SLIMP</i>                   | QLQKLDVNFRI IAVPARQLESWEQYRSSVELFSSSS-----KKFI <b>QVAN</b> ISI         | 318 |
| <i>Capitella_teleta_SLIMP</i>                | FYEEIKIPIRINHVGSSSLRTSESQRIDFEVWSSAF-----NRYF <b>KIGE</b> VSD          | 448 |
| <i>Anopheles_gambiae_SLIMP</i>               | FYDQLPVGYRIVQVPAPDLRPTESMRVDIEIFDGRN-----QRHV <b>KVAE</b> ELGY         | 371 |
| <i>Drosophila_melanogaster_SerRS2a</i>       | LFRRRLGNFRLLDMPPELGPAYQKYDIEAWMPGR-----QMWG <b>EISS</b> CSN            | 333 |
| <i>Acanthaster_planci_SRS2a</i>              | LFTELGLHFQVLDMP SHDLGAPAYRKYDIEAWMPAR-----QSYG <b>EISS</b> SASN        | 411 |
| <i>Strongylocentrotus_purpuratus_SerRS2a</i> | LFSDLGLHFQILDMPAHDLGAPAYRKF DCEAWMPHR-----KAYG <b>EVSS</b> TSN         | 430 |
| <i>Triboleum_casteum_SerRS2a</i>             | IFESLGLHFQVLDMPPELGAQAYRKYDIEAWMPGR-----GLYG <b>EISS</b> CSN           | 343 |
| <i>Stegodyphus_mimosarum_SerRS2a</i>         | LYSELGLHFKILEMPPCELGLPAYHKIDMEAWIPTQ-----KLYG <b>EISS</b> SASN         | 298 |
| <i>Ramazzottius_varieronatus_SerRS2a</i>     | LVSTLGLHAQVLDMPKEELGLAASRKFDIEAWMPGS-----QRYG <b>EISS</b> SASN         | 238 |
| <i>Pediculus_humanus_SerRS2a</i>             | IFSSLGLDYQILDMPMHGELGASAYRKHDIEAWFP GK-----EITY <b>GEISS</b> CSN       | 352 |
| <i>Octopus_bimaculoides_SerRS2</i>           | LYQSLGLHCRLLDMASQELGAPASRKFDYETWMPAK-----GFWG <b>EISS</b> SASN         | 378 |
| <i>Limulus_polyphemus_SerRS2a</i>            | LFQEIGLHFKLLDMPASDLGAPAYRKF D IEAWMPGR-----GIYG <b>EISS</b> SASN       | 364 |
| <i>Lottia_gigantea_SerRS2a</i>               | LFSQLGLHFRILEMSTECLGAPAYRKYDME TWMPGK-----HFWG <b>EISS</b> SASN        | 377 |
| <i>Hyalella_azteca_SerRS2a</i>               | LLQGLGLHGQVVLMPPEELGNPAYSKTDLEVWLPGR-----RRYA <b>EELT</b> SASN         | 357 |
| <i>Daphnia_pulex_SerRS2a</i>                 | LFSSLGLHYQLLDMP LHELGAPAYRKF D IEAWMPGR-----NMYG <b>EISS</b> SASN      | 345 |
| <i>Capitella_teleta_SerRS2a</i>              | LFSSLDLHVRVLDMP TQELGAPATRKFDMEAWMPAK-----KFWG <b>EISS</b> SASN        | 353 |
| <i>Anopheles_gambiae_SerRS2a</i>             | LF DQLGLHFLLDMPPELGPAYRKYDIEAWMPGR-----AMYG <b>EISS</b> CSD            | 346 |
| <i>Homo_sapiens_SerRS2</i>                   | ILTELGLHFRVLDMP TQELGLPAYRKF D IEAWMPGR-----GRFG <b>EVTS</b> SASN      | 424 |
| <i>Bos_taurus_SerRS2</i>                     | ILTELGLHFRVLDMP TQELGLPAYRKF D IEAWMPGR-----GRFG <b>EVTS</b> SASN      | 419 |
| <i>Danio_rerio_SerRS2</i>                    | IFSSLQLHYRVLDMP TQELGPPAYRKF D IEAWMPGR-----GSFG <b>EISS</b> SASN      | 451 |
| <i>Xenopus_tropicalus_SerRS2</i>             | IFSELGLHFVKVLEMP TQELGLPAYRKYDIEAWMPGR-----GKYG <b>EISS</b> TSN        | 498 |
| <i>Caenorhabditis_elegans_SerRS2</i>         | TFQALGVHCRQLEMPSEELGASAARKFDIEAWMPGR-----KLYG <b>EVSS</b> SASN         | 363 |
| <i>Trichinella_spiralis_SerRS2</i>           | LFSELNLHFNVLEMPTEELGASAFRKFDIE SWFPGR-----DCYG <b>EISS</b> SASN        | 344 |



# Supplementary Figure 2

|                                              |                                                       |     |
|----------------------------------------------|-------------------------------------------------------|-----|
| <i>Drosophila_melanogaster_SLIMP</i>         | YGDFVSKRILFSTRRE-----KHYDFLHMV-----GGPVL              | 421 |
| <i>Acanthaster_planci_SLIMP</i>              | CTDYISRVRKMRYPALPSQK-----AAQSRQRNFPHTV-----HCTAL      | 495 |
| <i>Strongylocentrotus_purpuratus_SLIMP</i>   | CTDFISRRLKIRYPTNPRES-----AAQSRKRSFGHTI-----HGTAL      | 479 |
| <i>Triboleum_casteum_SLIMP</i>               | YGDYISKRLLFTHVTKP-----PAFQYIILS-----GATHL             | 411 |
| <i>Stegodyphus_mimosarum_SLIMP</i>           | RNNFLSKRLLHITYGIQH-----SVEGYCSIV-----DGIVV            | 443 |
| <i>Ramazzottius_varieronatus_SLIMP</i>       | HDDFVSKRRLRCHVDKP-----EQNKFLRFF-----TGSL              | 505 |
| <i>Pediculus_humanus_SLIMP</i>               | SDKYICQRLLMYSYQMADK-----DDKSRFMKLV-----SGTIV          | 434 |
| <i>Octopus_bimaculoides_SLIMP</i>            | TGTYIGERLMISSSTQ-----D--KVAHVV-----HADLL              | 467 |
| <i>Limulus_polyphemus_SLIMP</i>              | NGEYISKRLMMRHCSKG-----NPNGLFLHLI-----HGTVV            | 447 |
| <i>Lottia_gigantea_SLIMP</i>                 | CDDFVSRRLMCLHDSKK-----EGSMFVHMI-----GGEVI             | 458 |
| <i>Hyalella_azteca_SLIMP</i>                 | IGDYISKRLLMMYVKDGRASSTSPRDGRAATGAVERLGFLQAV-----YAQAM | 679 |
| <i>Daphnia_pulex_SLIMP</i>                   | IGDYISRRLSIYG-----PNKEWPGFV-----TSQAL                 | 345 |
| <i>Capitella_teleta_SLIMP</i>                | RSDFISRRLMITNSSNARGF-----KEASPPFLI-----HATLT          | 482 |
| <i>Anopheles_gambiae_SLIMP</i>               | YTDFLSKRIAFIYHEG-----KVQRFPHVI-----AGTAM              | 401 |
| <i>Drosophila_melanogaster_SerRS2a</i>       | CTDYQARRLGIRYRRSA-----DGQILHAHTI-----NGTAT            | 365 |
| <i>Acanthaster_planci_SRS2a</i>              | CTDYQSRRLRIKYRSK-----EGDLRHAYTL-----NGTAC             | 442 |
| <i>Strongylocentrotus_purpuratus_SerRS2a</i> | CTDFQSRRLHIQYKPSF-----ESQAKYAHTL-----NGTAC            | 462 |
| <i>Triboleum_casteum_SerRS2a</i>             | CLDYQARRLGIRTHD-----GFVHTL-----NGTAC                  | 369 |
| <i>Stegodyphus_mimosarum_SerRS2a</i>         | CTDYQSRRLAIKYYNPL-----SNETKFCHTV-----NGTAC            | 330 |
| <i>Ramazzottius_varieronatus_SerRS2a</i>     | CKDFQSSRLNITYQKKP-----QETKDTLPFVHTV-----NGTAC         | 273 |
| <i>Pediculus_humanus_SerRS2a</i>             | CIDYQSRRLNIKYRDE-----DKLFHVHTV-----NGTAC              | 382 |
| <i>Octopus_bimaculoides_SerRS2</i>           | CTDYQSRRLGAKYK-----NKADQLTYVHTI-----NGTAC             | 409 |
| <i>Limulus_polyphemus_SerRS2a</i>            | CTDYQSRRLHIKYETQS-----PDGRRVLKHVHTV-----NGTAC         | 399 |
| <i>Lottia_gigantea_SerRS2a</i>               | CTDYQSRRLGIKYT-----DINGNYRHAHTV-----NGTAC             | 408 |
| <i>Hyalella_azteca_SerRS2a</i>               | CTSQAARLGASYV-----NKKGQRKLVHTV-----NGTAV              | 388 |
| <i>Daphnia_pulex_SerRS2a</i>                 | CTDYQARRLNIQSI-----DSSDTRRFVHTV-----NGTAC             | 376 |
| <i>Capitella_teleta_SerRS2a</i>              | CTDFQSRRLNIKYR-----NSNGELGHCHTV-----NGTGC             | 384 |
| <i>Anopheles_gambiae_SerRS2a</i>             | CTDYQARRLGIRVRTGQ-----EE--TFAHTV-----NGTAC            | 376 |
| <i>Homo_sapiens_SerRS2</i>                   | CTDFQSRRLHIMFQ-----TEAGELQFAHTV-----NATAC             | 455 |
| <i>Bos_taurus_SerRS2</i>                     | CTDFQSRRLHIMFQ-----TEAGELQFAHTV-----NATGC             | 450 |
| <i>Danio_rerio_SerRS2</i>                    | CTDYQSRRLDIRYE-----GEDGKLQYAHTV-----NATAC             | 482 |
| <i>Xenopus_tropicalus_SerRS2</i>             | CTDYQSRRLNIMYQ-----RQDGLRHAHTV-----NGTAC              | 529 |
| <i>Caenorhabditis_elegans_SerRS2</i>         | CTDFQSRRLGIKYK-----TADGTTKYAHTC-----NGTAL             | 394 |
| <i>Trichinella_spiralis_SerRS2</i>           | CTDYQSRRLLTKYK-----SSDGNLKFVHTVNKSIKLAQNVNGTAC        | 386 |

# Supplementary Figure 2

|                                       |                                                                                                                                                                                                             |     |
|---------------------------------------|-------------------------------------------------------------------------------------------------------------------------------------------------------------------------------------------------------------|-----|
| Drosophila_melanogaster_SLIMP         | YTS <b>R</b> LIAALVEHGVRLE-----DCKLLGSI <b>S</b> QKPVHQOD-LQQ-----F                                                                                                                                         | 459 |
| Acanthaster_planci_SLIMP              | DTS <b>V</b> ILAALLPSVHQQL-PEV--LK-----PY----LPQAI <b>P</b> K-----                                                                                                                                          | 526 |
| Strongylocentrotus_purpuratus_SLIMP   | KTS <b>V</b> LLSAML <b>D</b> YGALDL-KEA--KS-----                                                                                                                                                            | 501 |
| Triboleum_casteum_SLIMP               | KSP--PNCST <b>S</b> R <b>L</b> PQTA-PIY--NI--RHP <b>V</b> VLQAHVRE <b>P</b> MTRIT <b>P</b> LQ <b>N</b> -----ATYAYL                                                                                          | 459 |
| Stegodyphus_mimosarum_SLIMP           | NIP <b>V</b> LIACIMEN <b>F</b> QTKN-YGF--EI--PP--VLKEIM <b>D</b> NLYA-----                                                                                                                                  | 478 |
| Ramazzottius_varieronatus_SLIMP       | DLT <b>P</b> FVACCIDGSEGGI-FEH--IRRNPACVL-----                                                                                                                                                              | 534 |
| Pediculus_humanus_SLIMP               | DVP <b>K</b> LLGCLIEEQEDED-KKF--PI--PDFLVI-----                                                                                                                                                             | 462 |
| Octopus_bimaculoides_SLIMP            | DVS <b>R</b> MLAFLIEHGKIGE-NEL--LQ--LP-----RLKLD <b>A</b> IPELIP-----                                                                                                                                       | 503 |
| Limulus_polyphemus_SLIMP              | SIP <b>T</b> LIAAI <b>I</b> ENCQ <b>T</b> SD-CSF--VV--PK--VLQ <b>S</b> Y <b>M</b> LS-----                                                                                                                   | 479 |
| Lottia_gigantea_SLIMP                 | NIT <b>N</b> LLAL <b>M</b> LEYDLP-----LIS <b>N</b> K-----                                                                                                                                                   | 478 |
| Hyalella_azteca_SLIMP                 | DV <b>T</b> RVLAVAVENLQDAQ-GEA--NL--GK--LIDK <b>L</b> SS-----                                                                                                                                               | 710 |
| Daphnia_pulex_SLIMP                   | SVP <b>K</b> LLYCYLKN-----                                                                                                                                                                                  | 357 |
| Capitella_teleta_SLIMP                | SIQ <b>P</b> LLAAI <b>L</b> ENSQSKD-GRI--CL--PG-----VY-----                                                                                                                                                 | 508 |
| Anopheles_gambiae_SLIMP               | SSL <b>E</b> L <b>I</b> KLL <b>L</b> NGITMQ-----DLPMLN <b>T</b> LENE-----                                                                                                                                   | 429 |
| Drosophila_melanogaster_SerRS2a       | AIP <b>R</b> LLIALLESYQKED-G-I--EI--PA--VLR <b>P</b> FM <b>D</b> NQELITR <b>N</b> KRI-----PETK <b>L</b> V                                                                                                   | 412 |
| Acanthaster_planci_SRS2a              | AV <b>P</b> R <b>V</b> LLTLLECNQERD-GSV--SI--PK--ALQ <b>P</b> Y <b>M</b> NGK <b>T</b> VITK <b>P</b> PGG-----FLH <b>H</b> T                                                                                  | 489 |
| Strongylocentrotus_purpuratus_SerRS2a | AV <b>P</b> R <b>L</b> IAI <b>L</b> ENNQQRD-GSI--TI--PE--PLQ <b>P</b> Y <b>M</b> DGMREIT <b>R</b> PASG-----KLH <b>F</b> T                                                                                   | 509 |
| Triboleum_casteum_SerRS2a             | AV <b>P</b> R <b>L</b> LIALVEMGQ <b>R</b> KN-GTV--GL--PE--VLW <b>P</b> Y <b>M</b> GGK <b>Q</b> LIG <b>K</b> Q <b>S</b> V-----PDL <b>R</b> LI                                                                | 417 |
| Stegodyphus_mimosarum_SerRS2a         | AIP <b>R</b> LLMTIFENFQ <b>N</b> LD-GSI--TV--PA--PLQ <b>K</b> Y <b>M</b> GK <b>D</b> VI-KEK <b>F</b> S-----E-KI--L                                                                                          | 374 |
| Ramazzottius_varieronatus_SerRS2a     | AV <b>P</b> R <b>M</b> IAI <b>L</b> EQ <b>N</b> QLSN-GII--TI--PE--V <b>L</b> RRY <b>F</b> DN <b>A</b> VTLSK <b>P</b> TGA-----T-GLY <b>W</b> R                                                               | 321 |
| Pediculus_humanus_SerRS2a             | AIP <b>R</b> MLMALFETHQ <b>Q</b> Q <b>N</b> -GNI--LL--PK--PLR <b>P</b> FLNGKEVIQ <b>V</b> Q <b>N</b> SI-----PKL <b>I</b> SR                                                                                 | 430 |
| Octopus_bimaculoides_SerRS2           | AV <b>P</b> R <b>L</b> VM <b>A</b> I <b>I</b> ENNQL <b>P</b> N-GSV--LL--PQ--VLH <b>P</b> Y <b>F</b> Q <b>G</b> SL <b>L</b> TVE <b>P</b> K-----SLN <b>H</b> W <b>K</b>                                       | 455 |
| Limulus_polyphemus_SerRS2a            | AIP <b>R</b> MLIAI <b>L</b> ENFQ <b>T</b> KD-GDI--RI--PD--PLI <b>P</b> H <b>M</b> RGLAVIK <b>N</b> RR <b>T</b> K-----D-KI <b>Y</b> W <b>T</b>                                                               | 447 |
| Lottia_gigantea_SerRS2a               | AIP <b>R</b> MIAI <b>L</b> EQ <b>F</b> Q <b>T</b> KD-WNV--NI--PE--VLQ <b>P</b> Y <b>M</b> NN <b>K</b> T <b>Q</b> L <b>T</b> GP <b>Q</b> NK-----H-PT <b>K</b> W <b>I</b>                                     | 456 |
| Hyalella_azteca_SerRS2a               | AV <b>P</b> R <b>C</b> II <b>A</b> LCETHQ <b>E</b> AT-GRRAL <b>Q</b> L--PA--FLG <b>L</b> AP <b>A</b> HP <b>Q</b> Q <b>F</b> Q <b>P</b> NET <b>S</b> VDTG <b>H</b> E <b>H</b> NA <b>F</b> L                  | 443 |
| Daphnia_pulex_SerRS2a                 | AV <b>P</b> R <b>T</b> LIALLE <b>T</b> HQ <b>Q</b> SN-GEV--II--PA--VLQ <b>P</b> Y <b>L</b> NG <b>M</b> Q <b>R</b> LR <b>N</b> PT <b>Q</b> P-----F-K <b>M</b> K <b>W</b> I                                   | 424 |
| Capitella_teleta_SerRS2a              | AV <b>P</b> R <b>V</b> LS <b>L</b> I <b>E</b> NNQ <b>Q</b> SD-GTV--VI--PT--AL <b>R</b> S <b>F</b> M <b>A</b> G <b>Q</b> QL <b>I</b> S <b>A</b> SE <b>D</b> V-----L <b>P</b> N <b>T</b> H <b>W</b> I         | 433 |
| Anopheles_gambiae_SerRS2a             | AIP <b>R</b> MLIALLENFQ <b>N</b> ED-YTI--TV--PE--V <b>L</b> RRY <b>M</b> GGK <b>Q</b> LL <b>R</b> RR <b>R</b> K <b>V</b> L-----PE <b>L</b> K <b>L</b> T                                                     | 424 |
| Homo_sapiens_SerRS2                   | AV <b>P</b> R <b>L</b> LIALLES <b>N</b> Q <b>Q</b> KD-GSV--LV--PP--ALQ <b>S</b> Y <b>L</b> GT <b>D</b> RIT <b>A</b> PT <b>H</b> V-----P <b>L</b> Q <b>Y</b> I                                               | 501 |
| Bos_taurus_SerRS2                     | AV <b>P</b> R <b>L</b> LIALLESY <b>Q</b> Q <b>K</b> D-GSV--LV--PP--ALQ <b>P</b> Y <b>L</b> GT <b>D</b> RIT <b>T</b> P <b>T</b> H <b>V</b> -----P <b>L</b> Q <b>Y</b> I                                      | 496 |
| Danio_rerio_SerRS2                    | AIP <b>R</b> T <b>I</b> IAI <b>L</b> E <b>T</b> Y <b>Q</b> T <b>K</b> K-GTV--Q <b>V</b> --PE--VLQ <b>Q</b> Y <b>I</b> G <b>M</b> E <b>V</b> I <b>E</b> K <b>P</b> K <b>Y</b> T-----P <b>I</b> K <b>Y</b> I  | 528 |
| Xenopus_tropicalus_SerRS2             | AV <b>P</b> R <b>L</b> LIAI <b>L</b> ES <b>N</b> Q <b>R</b> KD-GAV--LI--PE--VLQ <b>P</b> Y <b>M</b> GT <b>D</b> VIE <b>K</b> PR <b>Y</b> I-----P <b>A</b> R <b>Y</b> I                                      | 575 |
| Caenorhabditis_elegans_SerRS2         | AS <b>T</b> R <b>A</b> LISV <b>L</b> E <b>T</b> FQ <b>N</b> DK <b>K</b> GLG--EL--PE--PLR <b>K</b> R <b>V</b> K <b>Q</b> R <b>G</b> S-----P <b>L</b> R <b>F</b> Q                                            | 435 |
| Trichinella_spiralis_SerRS2           | ALS <b>R</b> T <b>L</b> I <b>A</b> MLEQ <b>F</b> Q <b>C</b> KN-RQ <b>V</b> --NI--PK--F <b>L</b> LD <b>V</b> Y <b>N</b> V <b>E</b> M <b>K</b> R <b>Q</b> Y <b>A</b> E <b>R</b> K-----P <b>L</b> S <b>L</b> L | 433 |

### Supplementary Figure 3

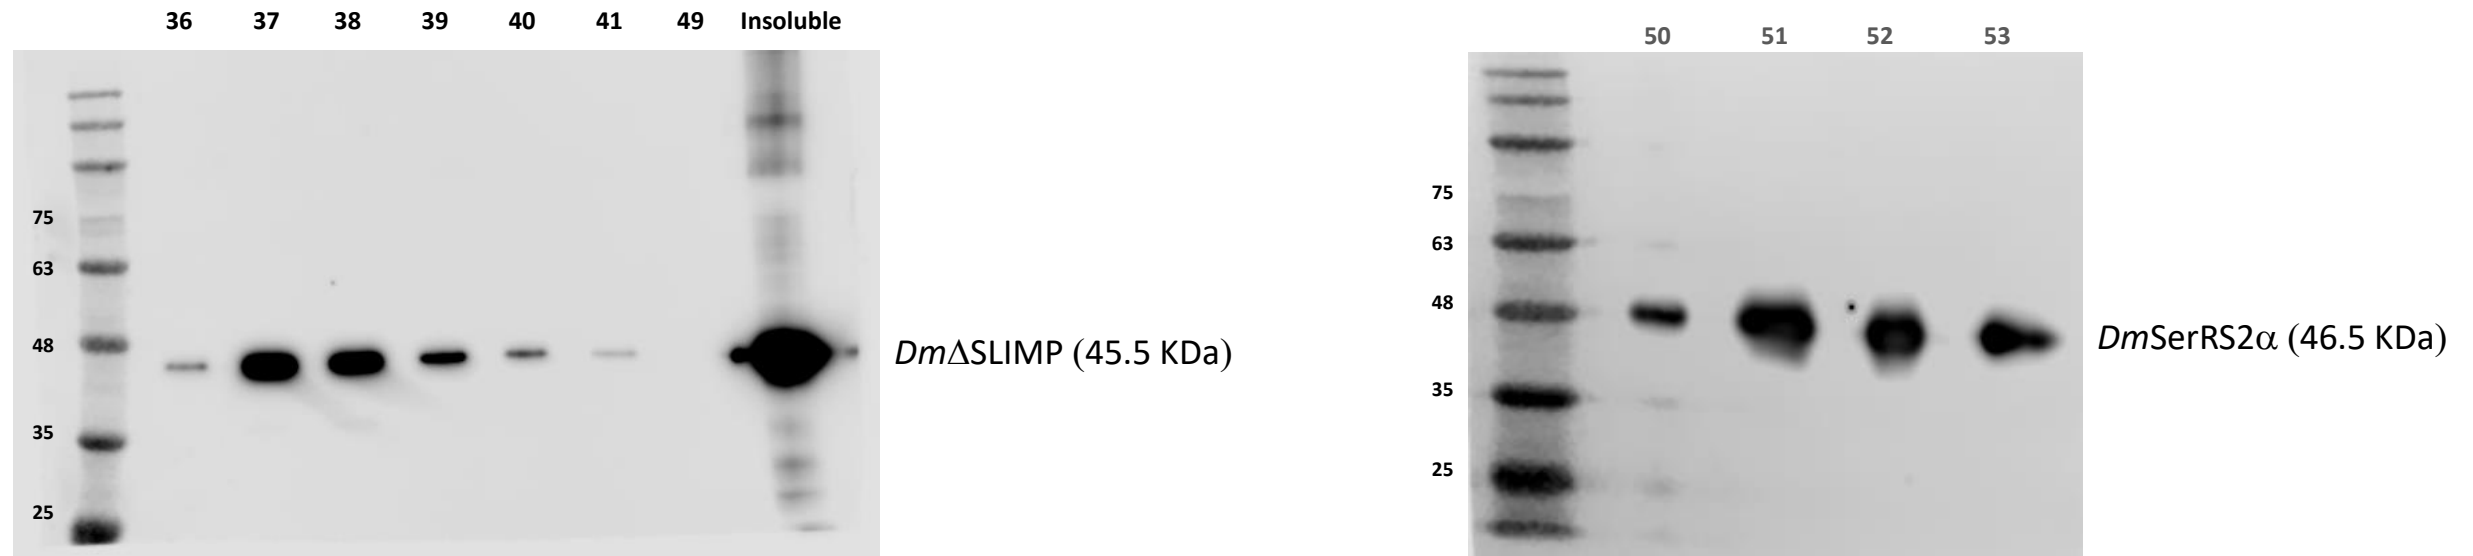

Western blot analyses of purified 6His-tagged *Dm*ΔSLIMP and *Dm*SerRS2α using an Anti-His antibody. These proteins were used to attempt the reconstitution of the *Dm*SerRS2α/ *Dm*ΔSLIMP complex.
